# Supplementary material
Source: PubMed Central journal article supplement (PMC4789917)
Supplement: dort001604.wf1_default.pdf [file dort001604.wf1_default.pdf]

**Figure A1. Business rules for indicator BLOOD PRESSURE 4 (percentage of patients with hypertension with a record of blood pressure)**

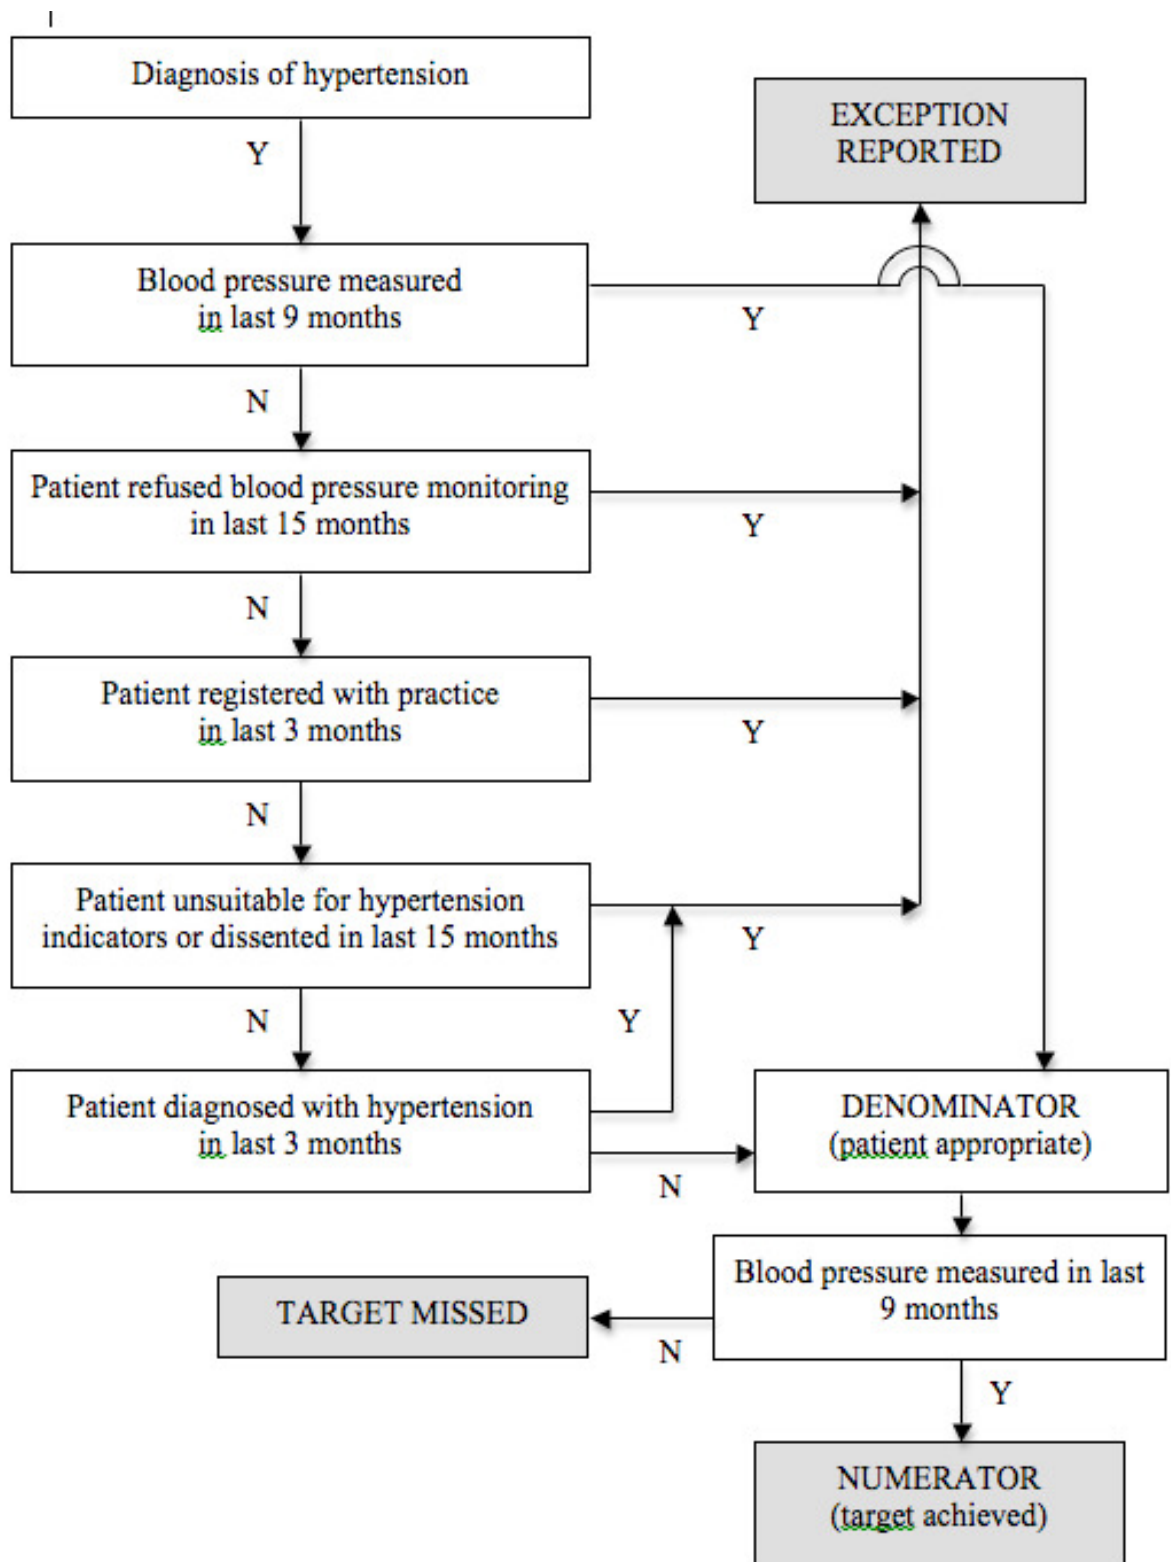

**Figure A2: Proportion of patients exception reported for excluded indicators, by indicator and reason, 2008/9**

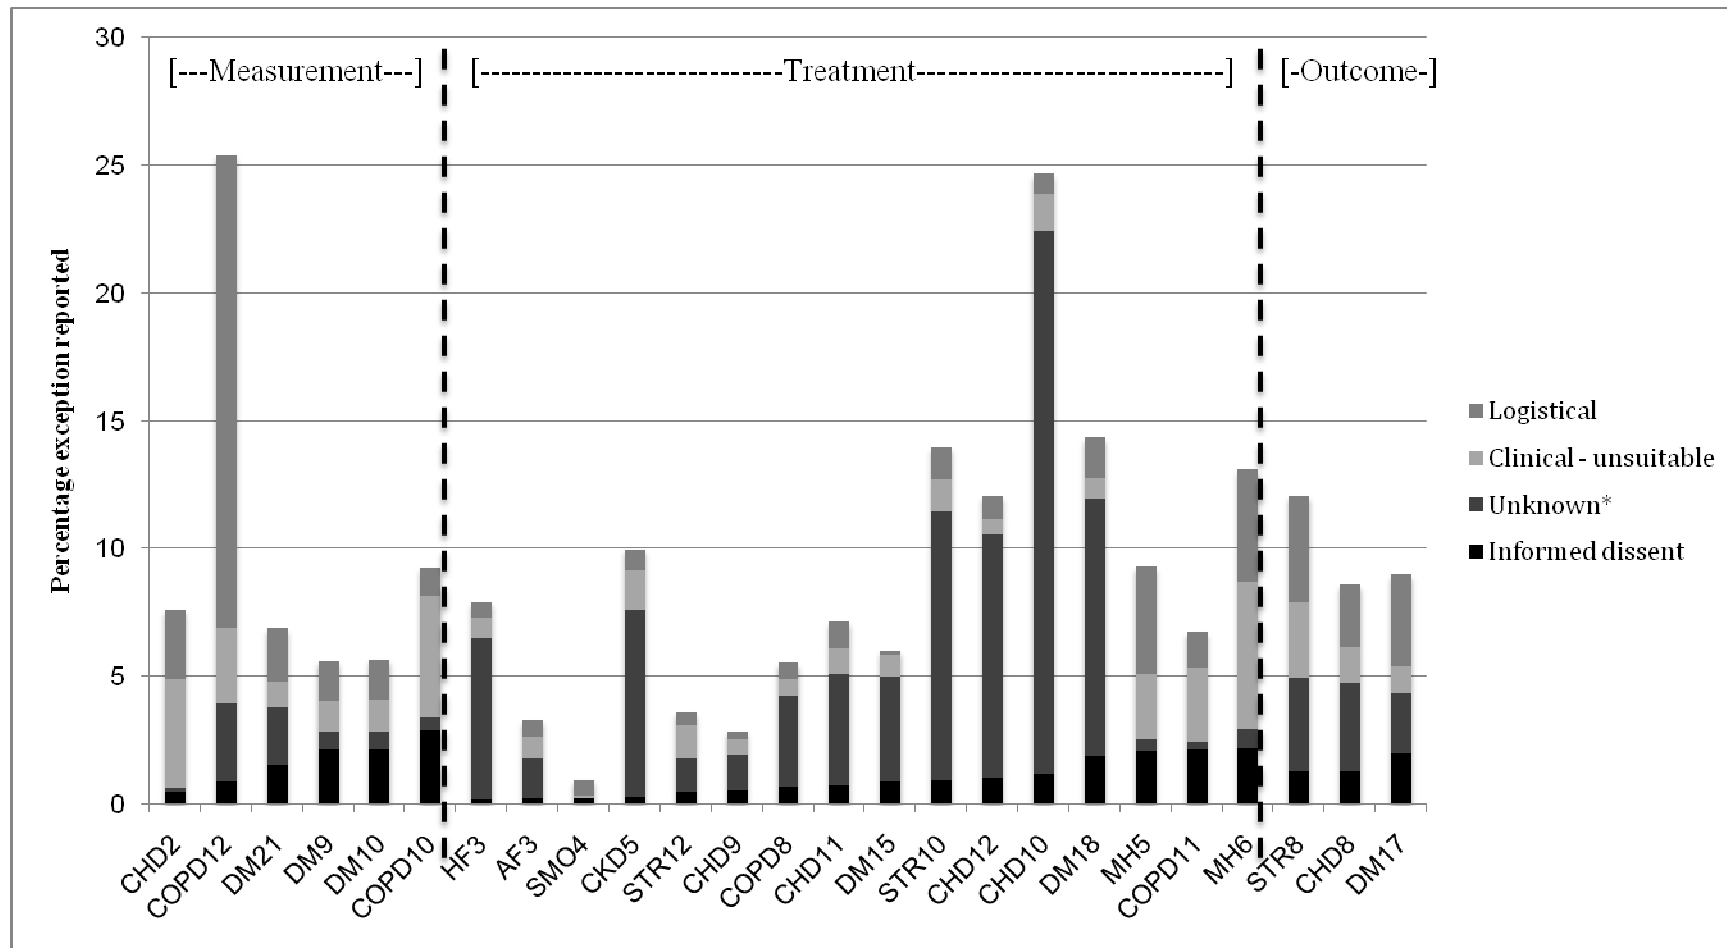

\* Unknown category includes patient refusal and clinical contraindication.

Columns ordered by i) type of activity; ii) rate of exception reporting attributable to informed dissent.

For 25 indicators for which reason for exception reporting was unknown (see table 2b).
