# Supplementary material
Source: PubMed Central journal article supplement (PMC4789917)
Supplement: dort001604.wt1_default.pdf [file dort001604.wt1_default.pdf]

**Table A1** Quality and Outcomes Framework clinical indicators excluded from main analysis (n=25)\*

| <b>Indicator</b>              | <b>Description</b>                                                     | <b>Indicator type</b> | <b>Upper payment threshold</b> | <b>Max. points available</b> | <b>No. of exceptions</b> | <b>Percent excepted</b> | <b>Median exception rate (interquartile range)</b> |
|-------------------------------|------------------------------------------------------------------------|-----------------------|--------------------------------|------------------------------|--------------------------|-------------------------|----------------------------------------------------|
| <i>Atrial fibrillation</i>    |                                                                        |                       |                                |                              |                          |                         |                                                    |
| AF 3<br>(731,222)             | Treated with anti-coagulation drug therapy or an anti-platelet therapy | Treatment             | 90                             | 15                           | 23,877                   | 3.3%                    | 2.4% (0.0-5.0)                                     |
| <i>Coronary heart disease</i> |                                                                        |                       |                                |                              |                          |                         |                                                    |
| CHD 2<br>(259,497)            | Referred for exercise testing and/or specialist assessment             | Measure               | 90                             | 7                            | 19,742                   | 7.6%                    | 5.8% (0.0-11.1)                                    |
| CHD 8<br>(1,883,192)          | Total cholesterol $\leq$ 5 mmol/l                                      | Outcome               | 70                             | 17                           | 161,406                  | 8.6%                    | 7.5% (4.9-10.8)                                    |
| CHD 9<br>(1,883,016)          | Treated with aspirin, anti-platelet therapy, or anti-coagulant         | Treatment             | 90                             | 7                            | 53,329                   | 2.8%                    | 2.2% (1.1-4.0)                                     |
| CHD 10<br>(1,882,594)         | Treated with a beta blocker                                            | Treatment             | 60                             | 7                            | 464,352                  | 24.7%                   | 24.4% (16.7-32.8)                                  |
| CHD 11<br>(286,521)           | Treated with an ACE inhibitor (patients with history of MI)            | Treatment             | 80                             | 7                            | 20,433                   | 7.1%                    | 5.3% (0.0-10.5)                                    |
| CHD 12<br>(1,882,778)         | Record of influenza vaccination                                        | Treatment             | 90                             | 7                            | 226,747                  | 12.0%                   | 11.3% (8.1-15.3)                                   |
| <i>Heart failure</i>          |                                                                        |                       |                                |                              |                          |                         |                                                    |

|                                            |                                                                                                                                   |           |    |    |         |       |                  |
|--------------------------------------------|-----------------------------------------------------------------------------------------------------------------------------------|-----------|----|----|---------|-------|------------------|
| HF 3<br>(210,163)                          | Currently treated with an ACE inhibitor or angiotensin receptor blocker                                                           | Treatment | 80 | 10 | 16,612  | 7.9%  | 5.4% (0.0-12.5)  |
| <i>Chronic kidney disease</i>              |                                                                                                                                   |           |    |    |         |       |                  |
| CKD 5<br>(210,442)                         | Treated with angiotensin converting enzyme inhibitor or angiotensin receptor blocker (patients with hypertension and proteinuria) | Treatment | 80 | 4  | 20,960  | 10.0% | 6.0% (0.0-15.0)  |
| <i>Chronic obstructive airways disease</i> |                                                                                                                                   |           |    |    |         |       |                  |
| COPD 8<br>(832,919)                        | Record of influenza immunisation                                                                                                  | Treatment | 85 | 6  | 103,889 | 12.5% | 11.4% (7.7-16.0) |
| COPD 10<br>(832,877)                       | Record of FeV1                                                                                                                    | Measure   | 70 | 7  | 77,058  | 9.3%  | 6.8% (2.9-12.8)  |
| COPD 11<br>(691,821)                       | Review, including an assessment of breathlessness                                                                                 | Treatment | 90 | 7  | 46,473  | 6.7%  | 4.9% (1.9-9.1)   |
| COPD 12<br>(89,599)                        | Diagnosis confirmed by post bronchodilator spirometry                                                                             | Measure   | 80 | 5  | 22,759  | 25.4% | 23.1% (9.1-40.0) |
| <i>Diabetes</i>                            |                                                                                                                                   |           |    |    |         |       |                  |
| DM 9<br>(2,208,548)                        | Record of presence or absence of peripheral pulses                                                                                | Measure   | 90 | 3  | 123,309 | 5.6%  | 4.4% (2.5-7.3)   |
| DM 10<br>(2,208,537)                       | Record of neuropathy testing                                                                                                      | Measure   | 90 | 3  | 124,699 | 5.6%  | 4.5% (2.6-7.4)   |

|                          |                                                                                                              |           |    |    |         |       |                   |
|--------------------------|--------------------------------------------------------------------------------------------------------------|-----------|----|----|---------|-------|-------------------|
| DM 15<br>(243,091)       | Treated with ACE inhibitors or A2 antagonists (patients with proteinuria or micro-albuminuria)               | Treatment | 80 | 3  | 14,557  | 6.0%  | 2.8% (0.0-8.9)    |
| DM 17<br>(2,208,371)     | Total cholesterol $\leq$ 5 mmol/l                                                                            | Outcome   | 70 | 6  | 198,048 | 9.0%  | 8.1% (5.7-11.3)   |
| DM 18<br>(2,208,483)     | Record of influenza immunisation                                                                             | Treatment | 85 | 3  | 316,524 | 14.3% | 13.5% (10.0-17.6) |
| DM 21<br>(2,198,307)     | Record of retinal screening                                                                                  | Measure   | 90 | 5  | 151,046 | 6.9%  | 5.7% (3.4-9.1)    |
| <i>Psychotic illness</i> |                                                                                                              |           |    |    |         |       |                   |
| MH 5<br>(55,061)         | Lithium levels in the therapeutic range                                                                      | Treatment | 90 | 2  | 5,104   | 9.3%  | 0.0% (0.0-14.3)   |
| MH 6<br>(386,804)        | Comprehensive care plan documented                                                                           | Treatment | 50 | 6  | 50,708  | 13.1% | 10.0% (4.3-17.8)  |
| <i>Smoking</i>           |                                                                                                              |           |    |    |         |       |                   |
| SMO 4<br>(1,917,513)     | Smoking cessation advice (CHD, stroke, hypertension, diabetes, COPD, CKD, asthma, schizophrenia, psychosis). | Treatment | 90 | 35 | 17,953  | 0.9%  | 0.6% (0.0-1.2)    |
| <i>Stroke</i>            |                                                                                                              |           |    |    |         |       |                   |
| STR 8<br>(899,455)       | Total cholesterol $\leq$ 5 mmol/l                                                                            | Outcome   | 60 | 5  | 108,344 | 12.0% | 10.4% (6.6-15.2)  |

|                     |                                              |           |    |   |         |       |                  |
|---------------------|----------------------------------------------|-----------|----|---|---------|-------|------------------|
| STR 10<br>(899,362) | Record of influenza immunisation             | Treatment | 85 | 2 | 125,577 | 14.0% | 13.3% (9.1-18.2) |
| STR 12<br>(596,262) | Treated with anti-platelet or anti-coagulant | Treatment | 90 | 4 | 21,295  | 3.6%  | 2.6% (0.0-5.3)   |

\*Available data do not differentiate between some reasons for exception reporting for these indicators, hence they were excluded from analyses relating to reasons for exception reporting.
